# Supplementary material for: On the influence of coordinating solvents on the reduction of selenium for the phosphine-free synthesis of metal selenide nanoparticles
Source: Royal Society of Chemistry journal article supplement (doi:10.1039/c5nj02676h), 2015-11-16
Supplement: c5nj02676h2.pdf [file c5nj02676h2.pdf]

## On the influence of coordinating solvents on the reduction of selenium for the phosphine-free synthesis of metal selenide nanoparticles

Julia Zimdars and Michael Bredol

Muenster University of Applied Sciences, Department of Chemical Engineering, Stegerwaldstr. 39, 48565 Steinfurt, Germany

### Electronic Supplementary Information

#### Table of contents

|                                                                                     | <b>page</b> |
|-------------------------------------------------------------------------------------|-------------|
| NMR data _ <sup>13</sup> C-NMR spectra of Se-OLA complex / OLA in CDCl <sub>3</sub> | 1           |
| NMR data _ <sup>1</sup> H-NMR spectra of Se-OLA complex / OLA in CDCl <sub>3</sub>  | 2           |

Zimd005.701.1.1r  
Zimd005 -  $^{13}\text{C}\{\text{H}\}$  - NMR -  $\text{CDCl}_3$  - T=300K 2

On the influence of coordinating solvents on the reduction of selenium for the phosphine-free synthesis of metal selenide nanoparticles

Julia Zimdars and Michael Bredol

$^{13}\text{C}$ -NMR spectra of Se-OLA complex (bottom) / OLA in  $\text{CDCl}_3$  (top)

Zimd004.701.1.1r  
Zimd004 -  $^{13}\text{C}\{\text{H}\}$  - NMR -  $\text{CDCl}_3$  - T=300K 1

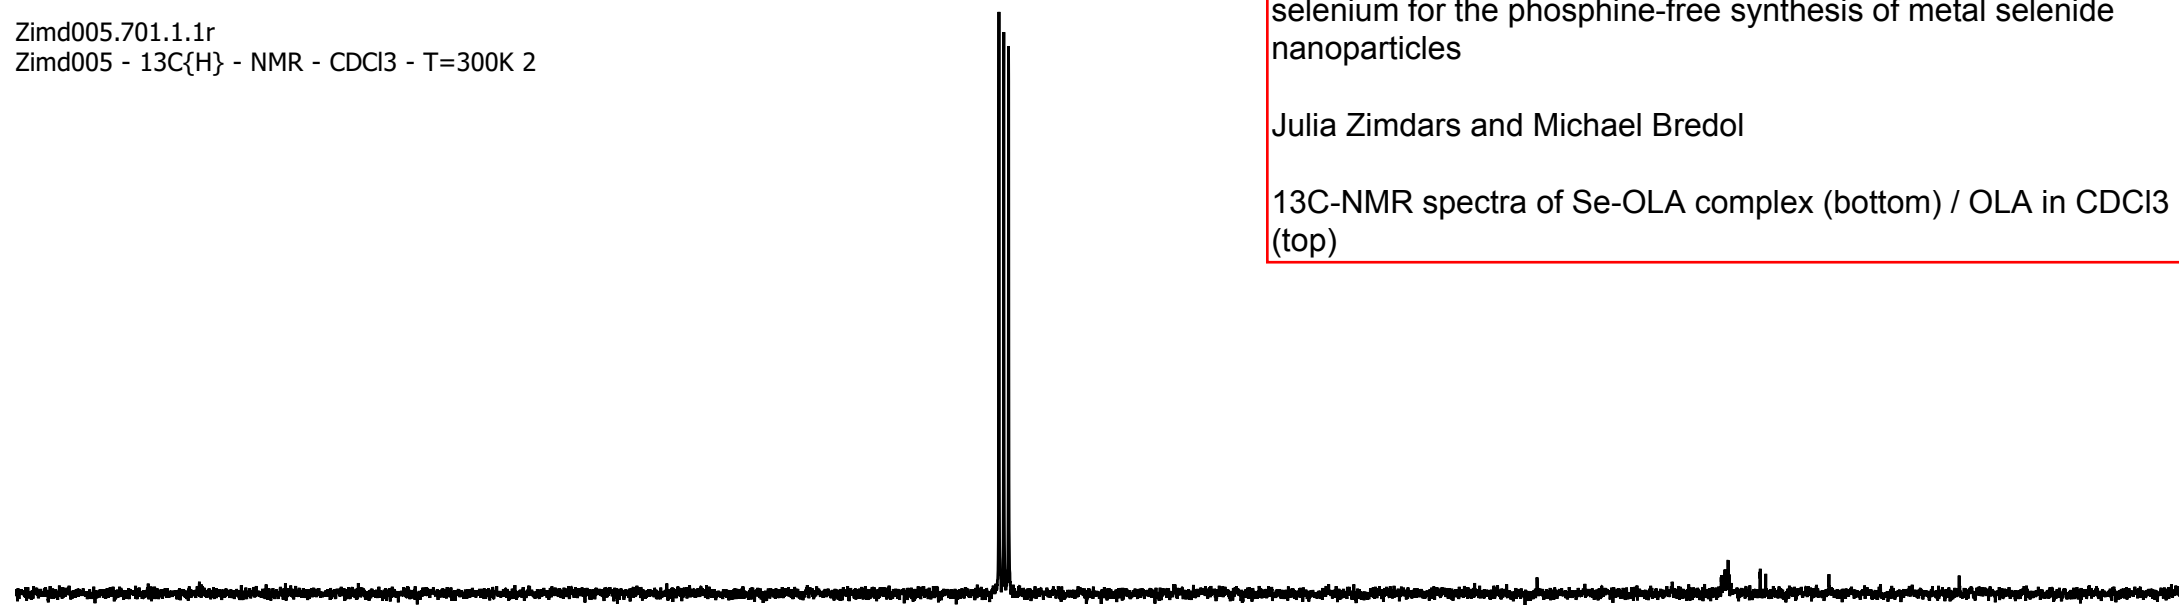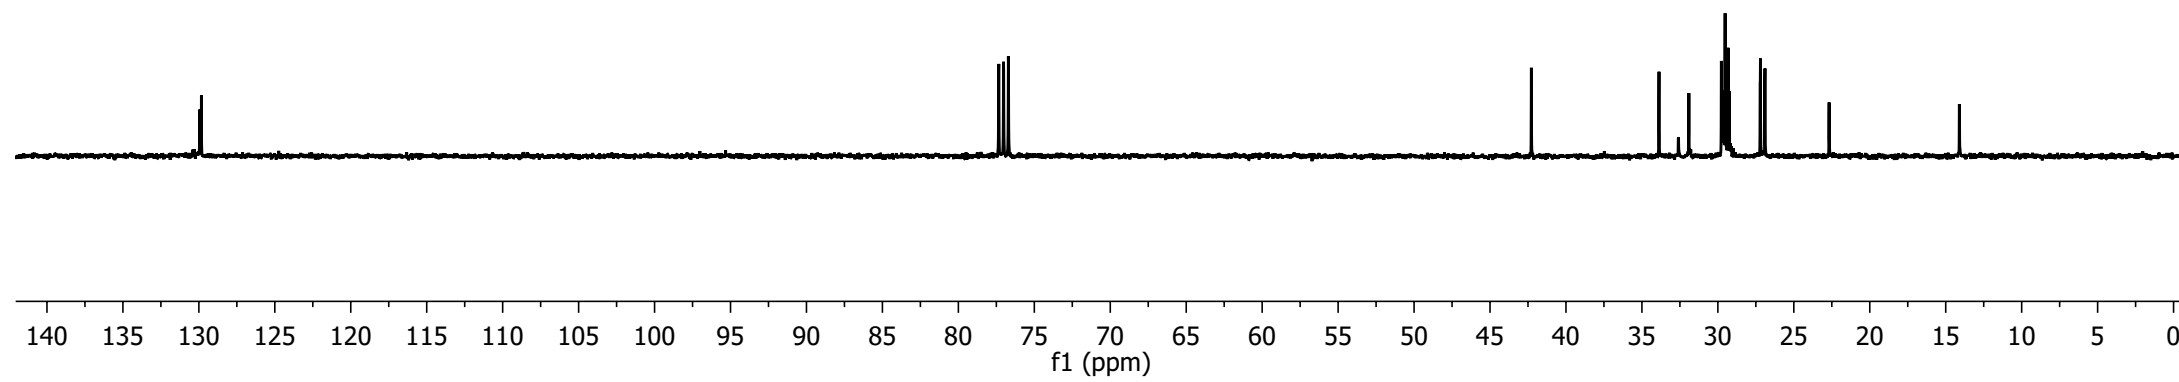

Zimd006.700.1.1r  
Zimd006 - 1H - NMR - CDCl3 - T=300K 2

On the influence of coordinating solvents on the reduction of selenium for the phosphine-free synthesis of metal selenide nanoparticles

Julia Zimdars and Michael Bredol

1H-NMR spectra of OLA (bottom) / Se-OLA complex (top) in CDCl3

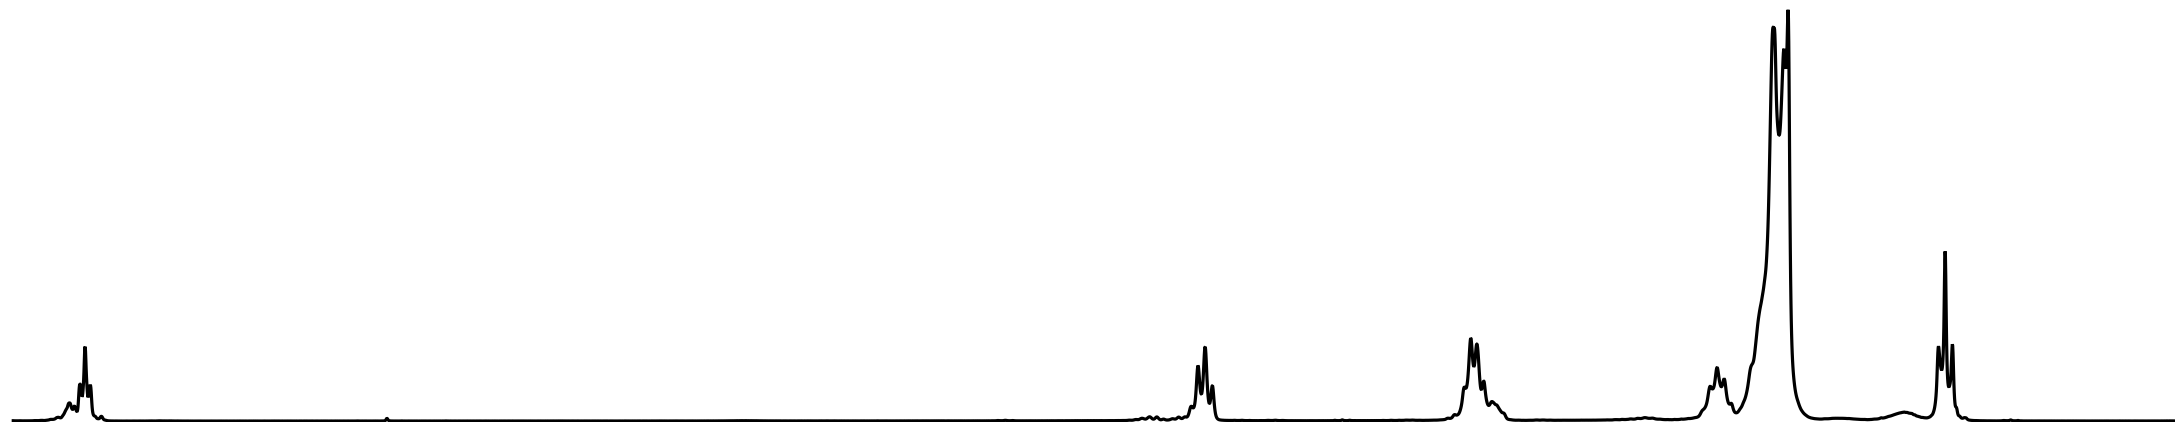

Zimd004.700.1.1r  
Zimd004 - 1H - NMR - CDCl3 - T=300K 1

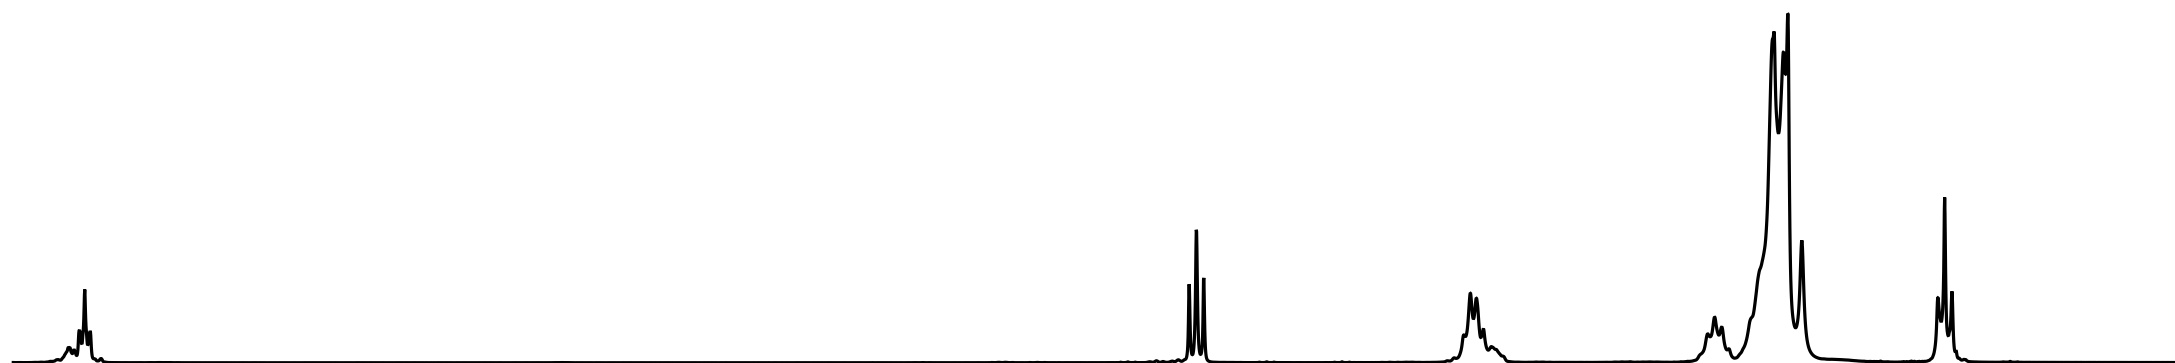

5.4 5.2 5.0 4.8 4.6 4.4 4.2 4.0 3.8 3.6 3.4 3.2 3.0 2.8 2.6 2.4 2.2 2.0 1.8 1.6 1.4 1.2 1.0 0.8 0.6 0.4  
f1 (ppm)
