# Supplementary figures and images for: On the influence of coordinating solvents on the reduction of selenium for the phosphine-free synthesis of metal selenide nanoparticles
Source: Royal Society of Chemistry journal article supplement (doi:10.1039/c5nj02676h), 2015-11-16

Zimd005.701.1.1r  
Zimd005 -  $^{13}\text{C}\{\text{H}\}$  - NMR -  $\text{CDCl}_3$  - T=300K 2

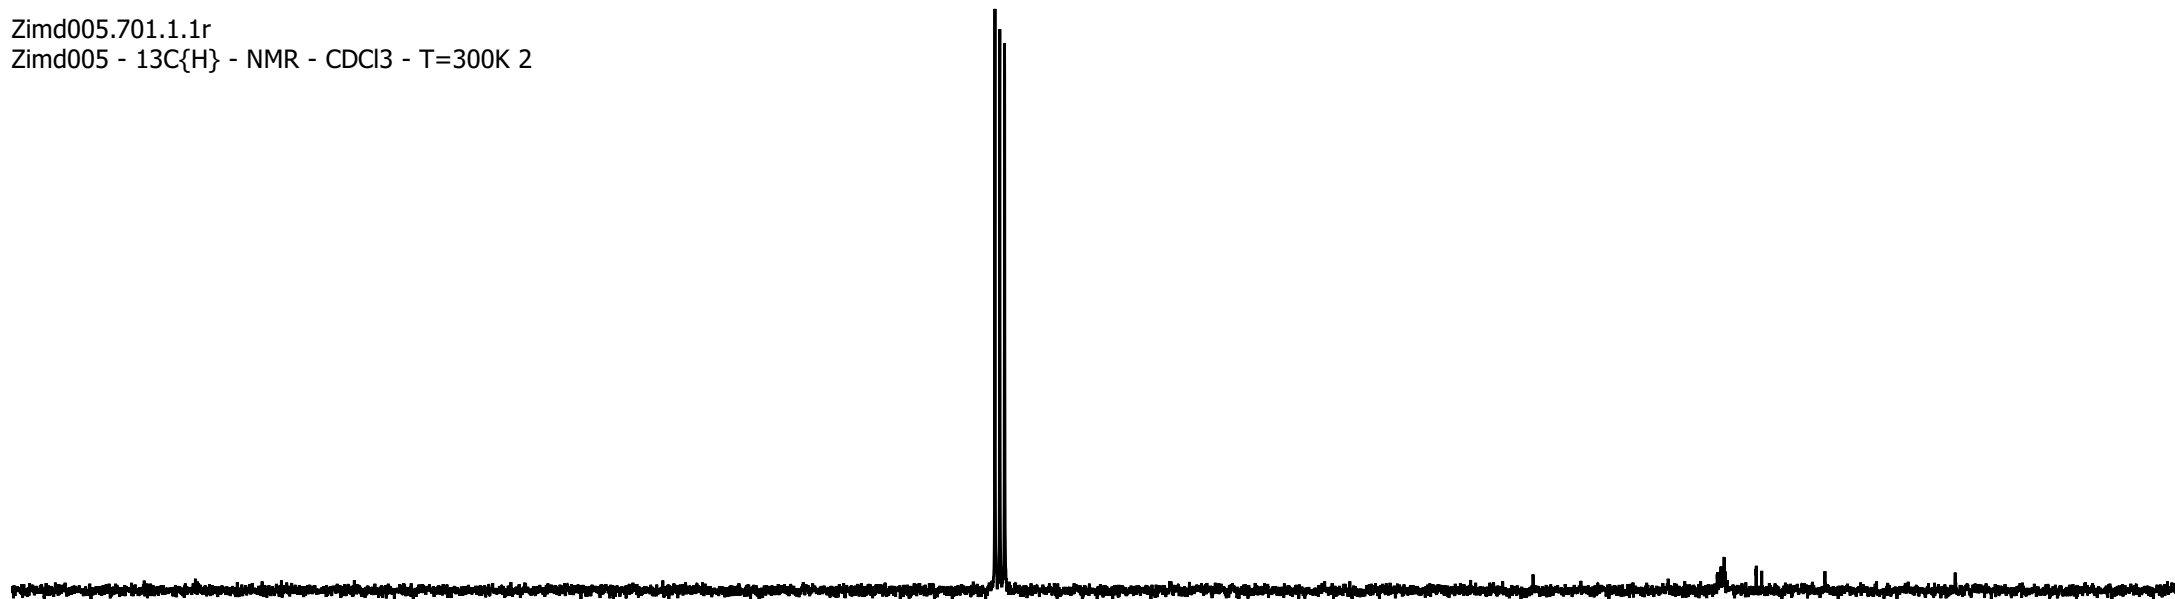

Zimd004.701.1.1r  
Zimd004 -  $^{13}\text{C}\{\text{H}\}$  - NMR -  $\text{CDCl}_3$  - T=300K 1

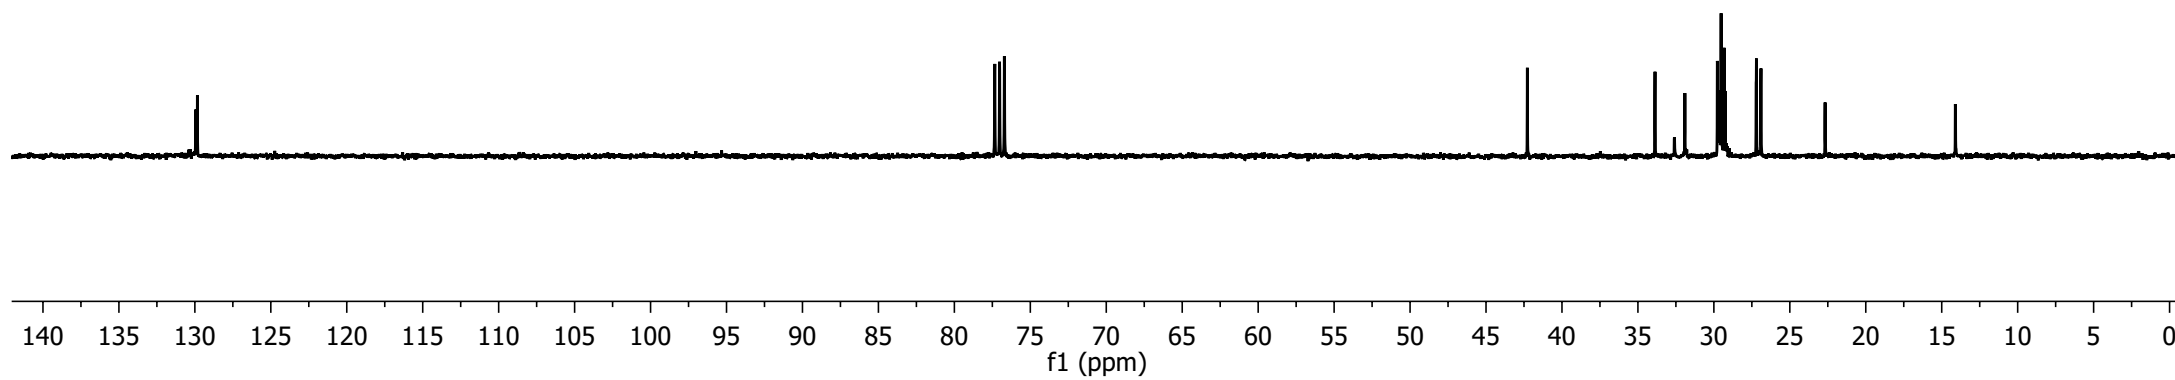

Supplement: c5nj02676h1.pdf [file c5nj02676h1.pdf]

Zimd006.700.1.1r  
Zimd006 - 1H - NMR - CDCl3 - T=300K 2

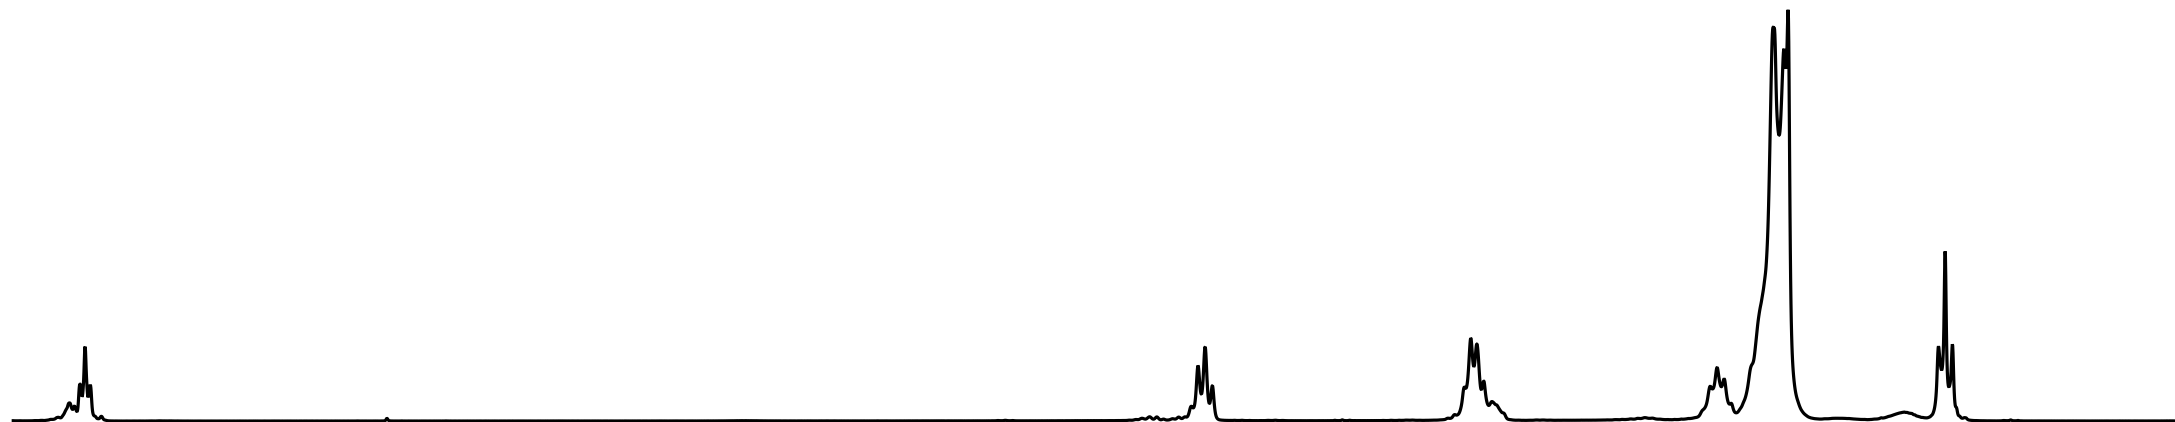

Zimd004.700.1.1r  
Zimd004 - 1H - NMR - CDCl3 - T=300K 1

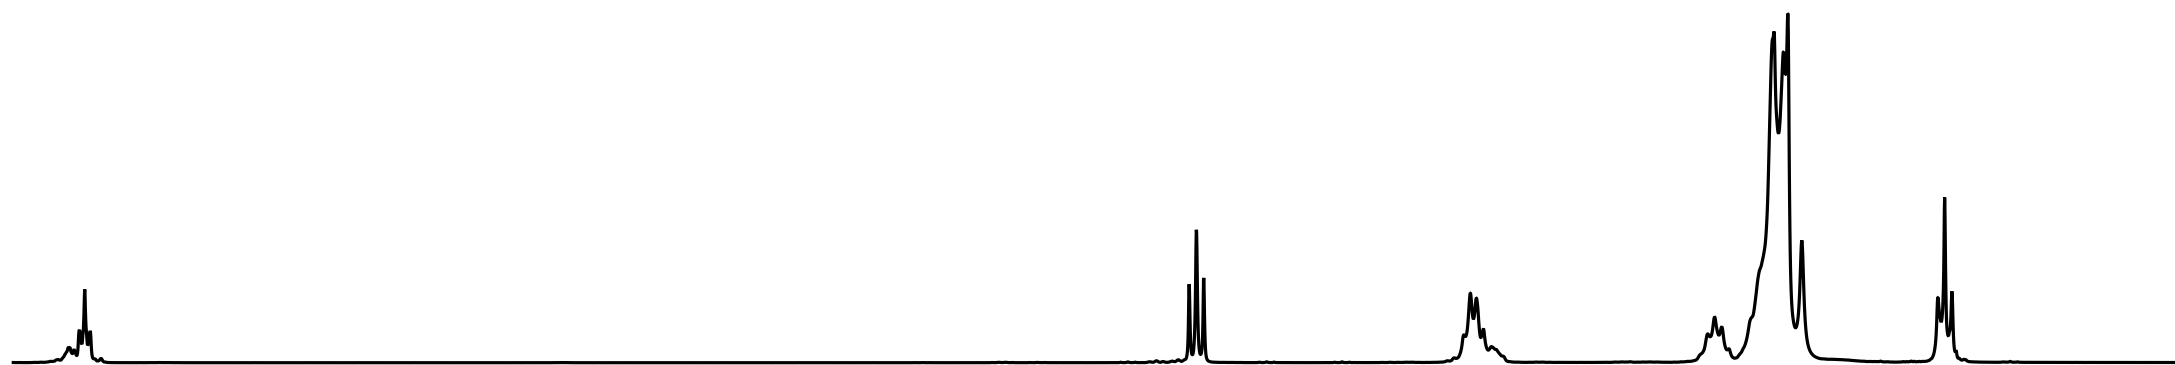

5.4 5.2 5.0 4.8 4.6 4.4 4.2 4.0 3.8 3.6 3.4 3.2 3.0 2.8 2.6 2.4 2.2 2.0 1.8 1.6 1.4 1.2 1.0 0.8 0.6 0.4  
f1 (ppm)

Supplement: c5nj02676h3.pdf [file c5nj02676h3.pdf]
